# Supplementary material for: 3D nanoporous NiCoP as a highly efficient electrocatalyst for the hydrogen evolution reaction in alkaline electrolyte
Source: Royal Society of Chemistry journal article supplement (doi:10.1039/d2nj00512c), 2022-01-01
Supplement: d2nj00512c1.pdf [file d2nj00512c1.pdf]

## Supporting Information

### 3D nano-porous NiCoP as a highly efficient electrocatalyst for hydrogen evolution reaction in alkaline electrolyte

Qi Zhou<sup>a, b, \*</sup>, Denghui Wang<sup>a, b</sup>

<sup>a</sup>State Key Laboratory of Advanced Processing and Recycling of Non-ferrous Metals, Lanzhou University of Technology, Lanzhou, 730050, Gansu, P. R. China

<sup>b</sup>School of Materials Science and Engineering, Lanzhou University of Technology, Lanzhou, 730050, Gansu, P. R. China

\*Corresponding author.

E-mail address: [zhouxq301@sina.com](mailto:zhouxq301@sina.com)

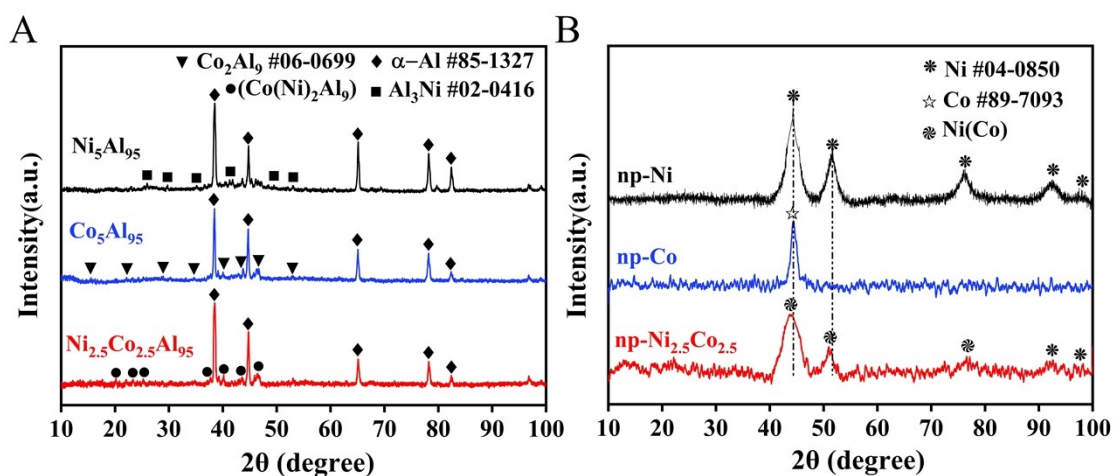

**Figure S1.** (A) XRD patterns of  $\text{Ni}_x\text{Co}_{5-x}\text{Al}_9$  ( $x=5, 2.5, 0$ ) precursor strips.

(B) XRD patterns of  $\text{np-Ni}_x\text{Co}_{5-x}$  ( $x=5, 2.5, 0$ ) dealloyed powder

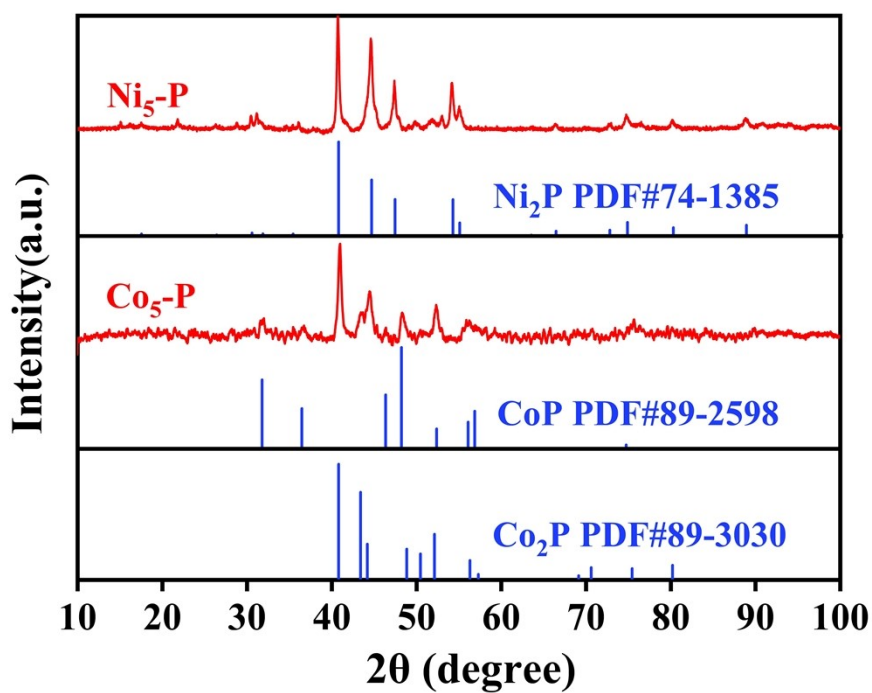

Figure S2. XRD patterns of  $\text{Ni}_5\text{-P}$  and  $\text{Co}_5\text{-P}$ .

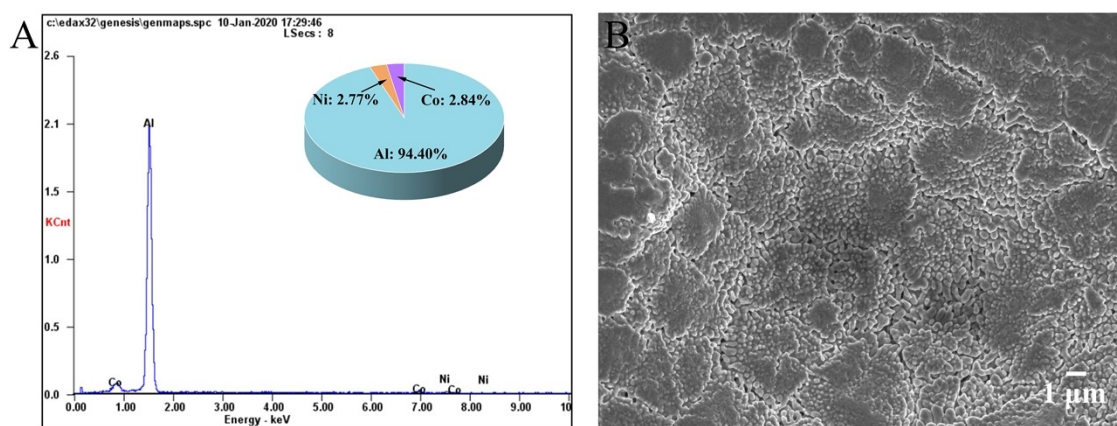

Figure S3. (A) EDX of  $\text{Ni}_{2.5}\text{Co}_{2.5}\text{Al}_{95}$  precursor strips. The inset image corresponds to elemental content.

(B) SEM of  $\text{Ni}_{2.5}\text{Co}_{2.5}\text{Al}_{95}$  precursor strips.

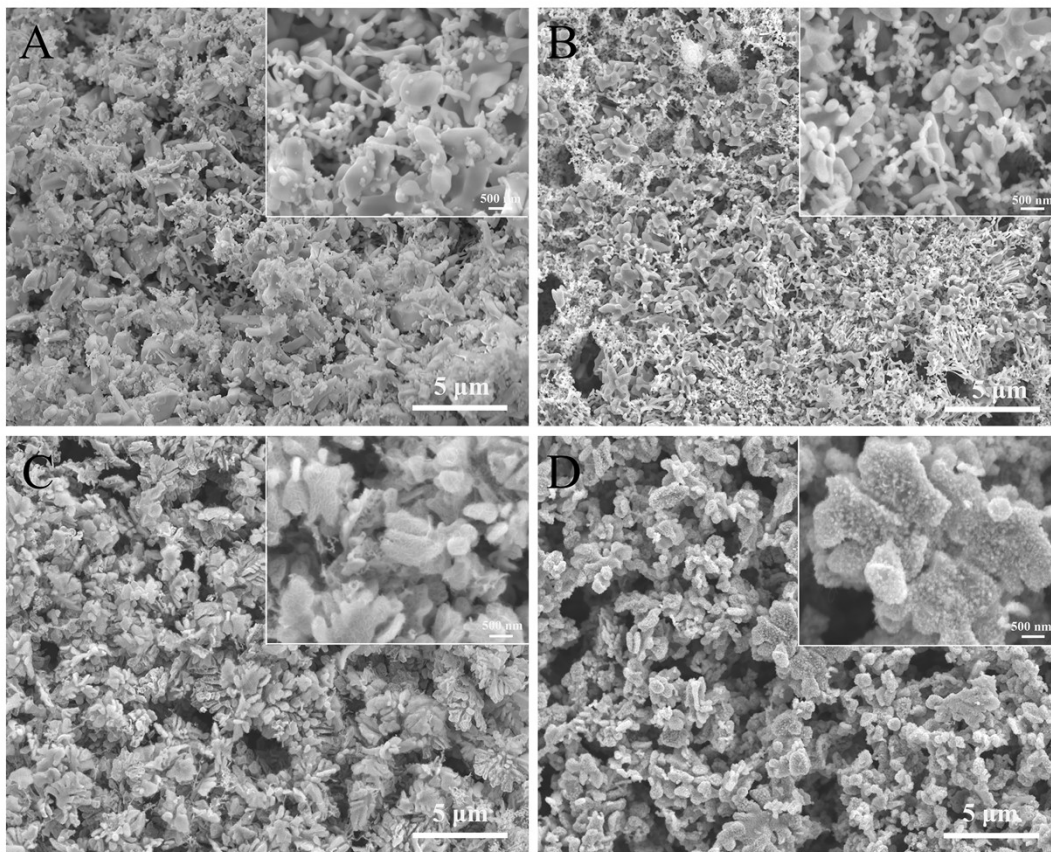

**Figure S4.** SEM images of (a) np-Ni<sub>5</sub>, (b) Ni<sub>5</sub>-P, (c) np-Co<sub>5</sub>, (d) Co<sub>5</sub>-P

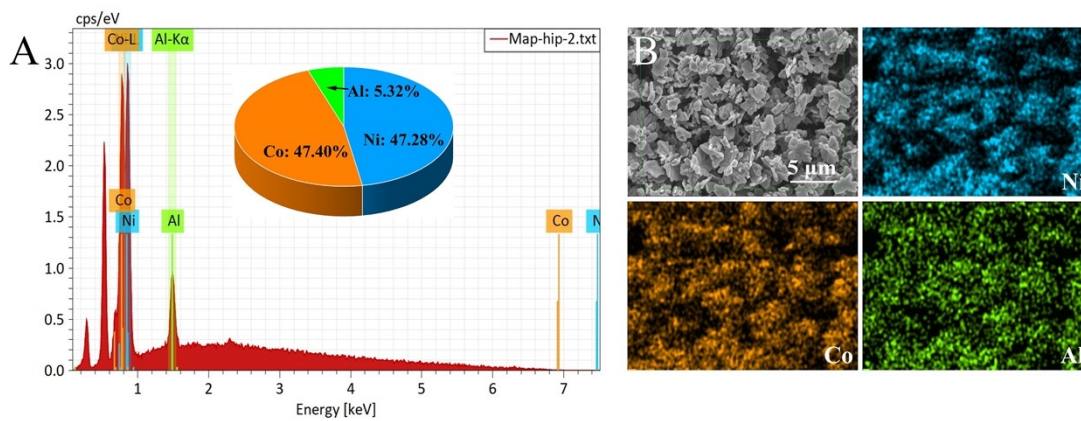

**Figure S5.** (A) EDX spectrum of np-Ni<sub>2.5</sub>Co<sub>2.5</sub>. The inset image corresponds to elemental content.

(B) Elemental mapping images of np-Ni<sub>2.5</sub>Co<sub>2.5</sub>

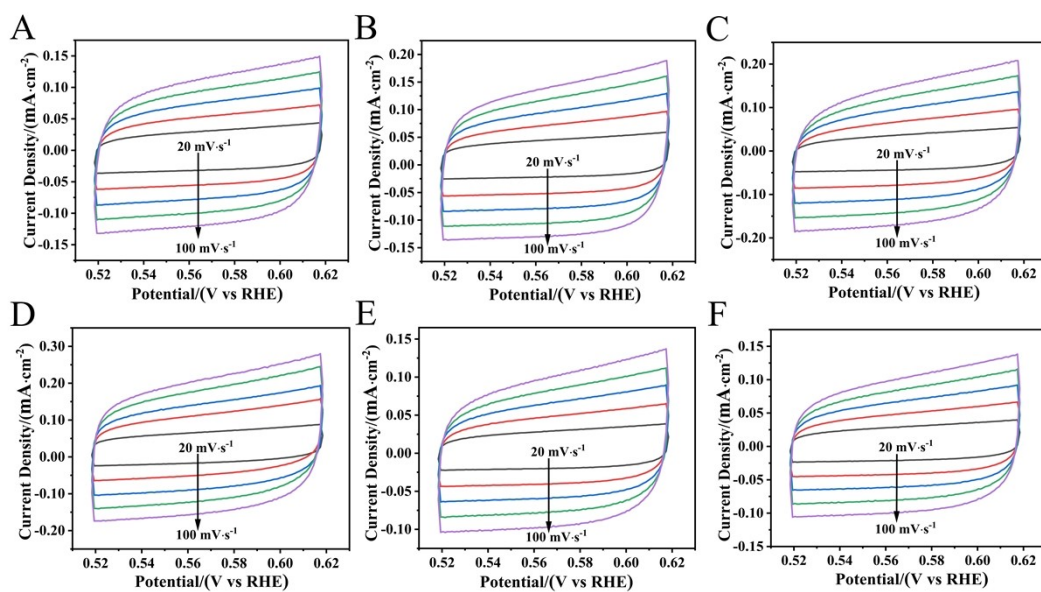

**Figure S6.** Cyclic voltammograms of (a) np-Ni<sub>5</sub>, (b) Ni<sub>5</sub>-P, (c) np-Ni<sub>2.5</sub>Co<sub>2.5</sub>, (d) Ni<sub>2.5</sub>Co<sub>2.5</sub>-P (e) np-Co<sub>5</sub>, (f) Co<sub>5</sub>-P

**Table S1.** Fitting data of each component in the equivalent circuit of each electrode

| Electrodes                             | $R_s/\Omega \cdot \text{cm}^{-2}$ | CPE/F                  | $R_{ct}/\Omega \cdot \text{cm}^{-2}$ |
|----------------------------------------|-----------------------------------|------------------------|--------------------------------------|
| np-Ni <sub>5</sub>                     | 1.212                             | $1.531 \times 10^{-3}$ | 15.93                                |
| Ni <sub>5</sub> -P                     | 1.048                             | $2.222 \times 10^{-3}$ | 17.45                                |
| np-Ni <sub>2.5</sub> Co <sub>2.5</sub> | 1.216                             | $5.238 \times 10^{-3}$ | 11.04                                |
| Ni <sub>2.5</sub> Co <sub>2.5</sub> -P | 1.083                             | $3.253 \times 10^{-2}$ | 10.93                                |
| np-Co <sub>5</sub>                     | 1.140                             | $6.468 \times 10^{-3}$ | 55.35                                |
| Co <sub>5</sub> -P                     | 1.085                             | $3.438 \times 10^{-2}$ | 13.01                                |



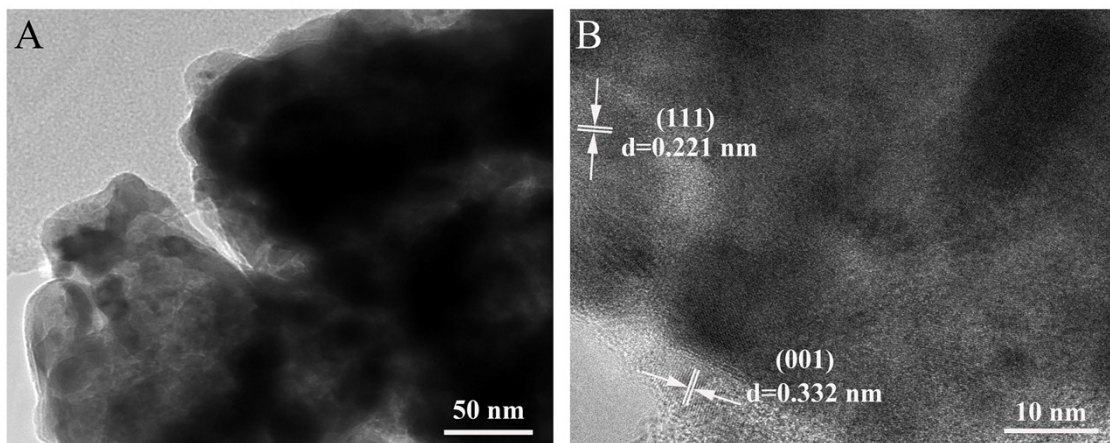

**Figure S7.** (A) TEM image of  $\text{Ni}_{2.5}\text{Co}_{2.5}\text{-P}$  after electrochemical HER test.  
(B) HRTEM image of  $\text{Ni}_{2.5}\text{Co}_{2.5}\text{-P}$  after electrochemical HER test.
